# Supplementary material for: Weight Loss Decreases Excess Pancreatic Triacylglycerol Specifically in Type 2 Diabetes
Source: Oxford University Press journal article supplement (doi:10.2337/dc15-0750), 2015-12-01

## SUPPLEMENTARY DATA

**Supplementary Figure S1.** Change in (A) hepatic triacylglycerol, (B) fasting hepatic glucose output and (C) hepatic insulin resistance index in the T2DM and NGT groups pre-surgery and at 8 weeks post-surgery.

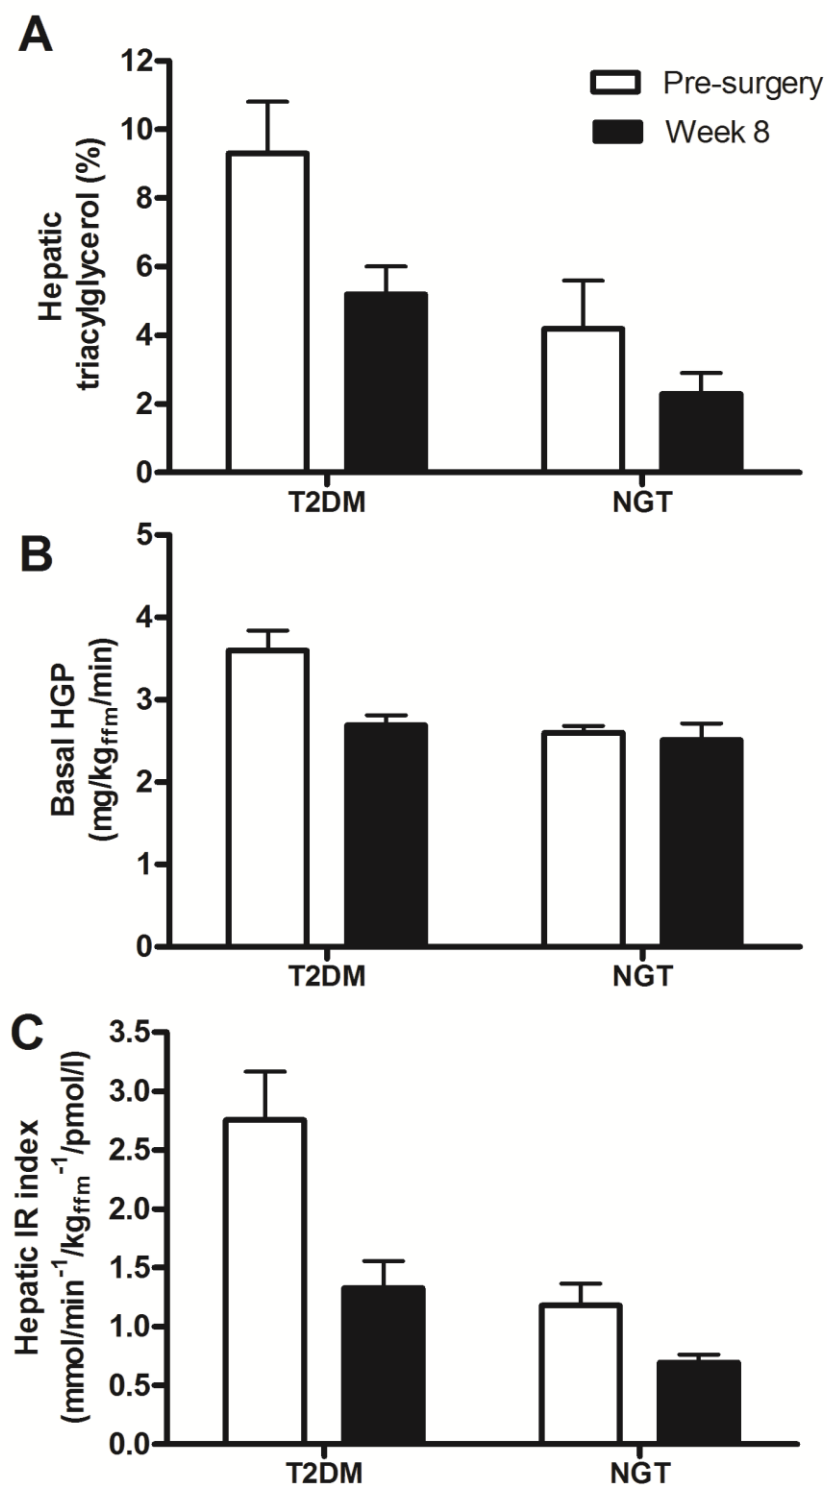

Supplement: dc150750supplementarydata.pdf [file dc150750supplementarydata.pdf]
